# Supplementary material for: Phosphorus deficiencies invoke lipids-like enrich in sweetpotato rhizosphere to stimulate bacterial inositol phosphate metabolism
Source: Research Square preprint supplement (doi:10.21203/rs.3.rs-1778928/v1), 2022-07-05
Supplement: Supplementary file 1 [file 6533cf9fd24baa073647d744.docx]

**Phosphorus deficiencies invoke lipids-like enrich in sweetpotato rhizosphere to stimulate bacterial inositol phosphate metabolism**

**Xiaoya Zhu, Jing Wang, Qiangqiang Zhang, Peng Zhao, Ming Liu, Rong Jin, Aijun Zhang, Zhonghou Tang***

Xuzhou Sweetpotato Research Center, Xuzhou Institute of Agricultural Sciences Jiangsu, China/ /National Agricultural Experimental Station for Soil Quality, Xuzhou, China

Number of figures: 3

* Corresponding author: Zhonghou Tang

Tel: +86-0516-82028152

Email: zhonghoutang@sina.com


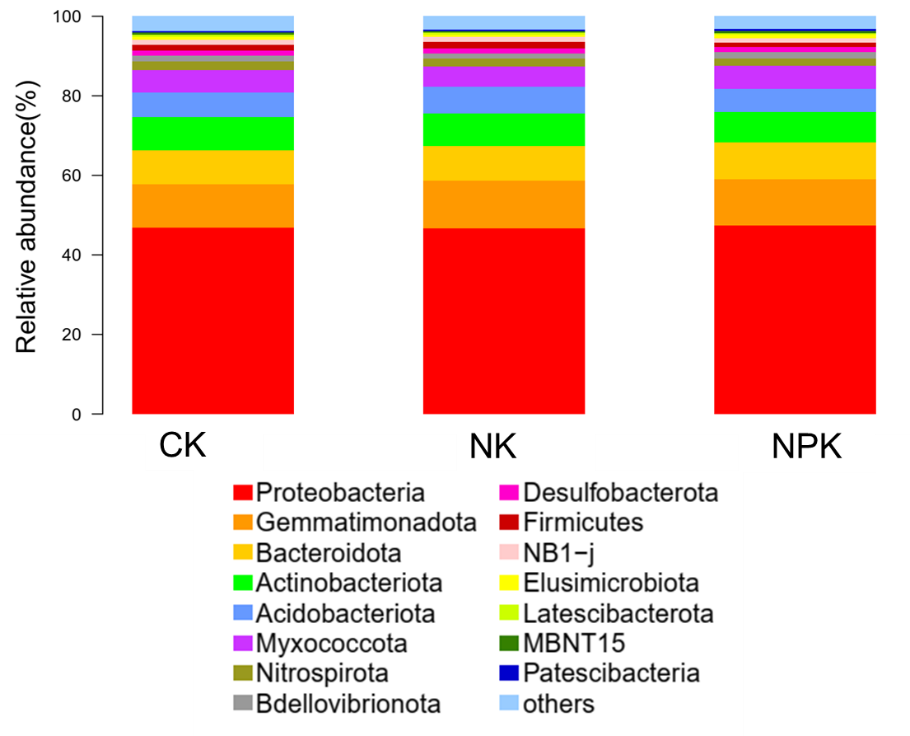


Fig. S1 Top 15 dominant phylum of bacterial community Shangshu 19 rhizosphere among different treatments. Note: CK, NK and NPK represent non fertilization treatment, nitrogen and potassium application treatment and nitrogen, phosphorus and potassium application treatment, respectively. Same below


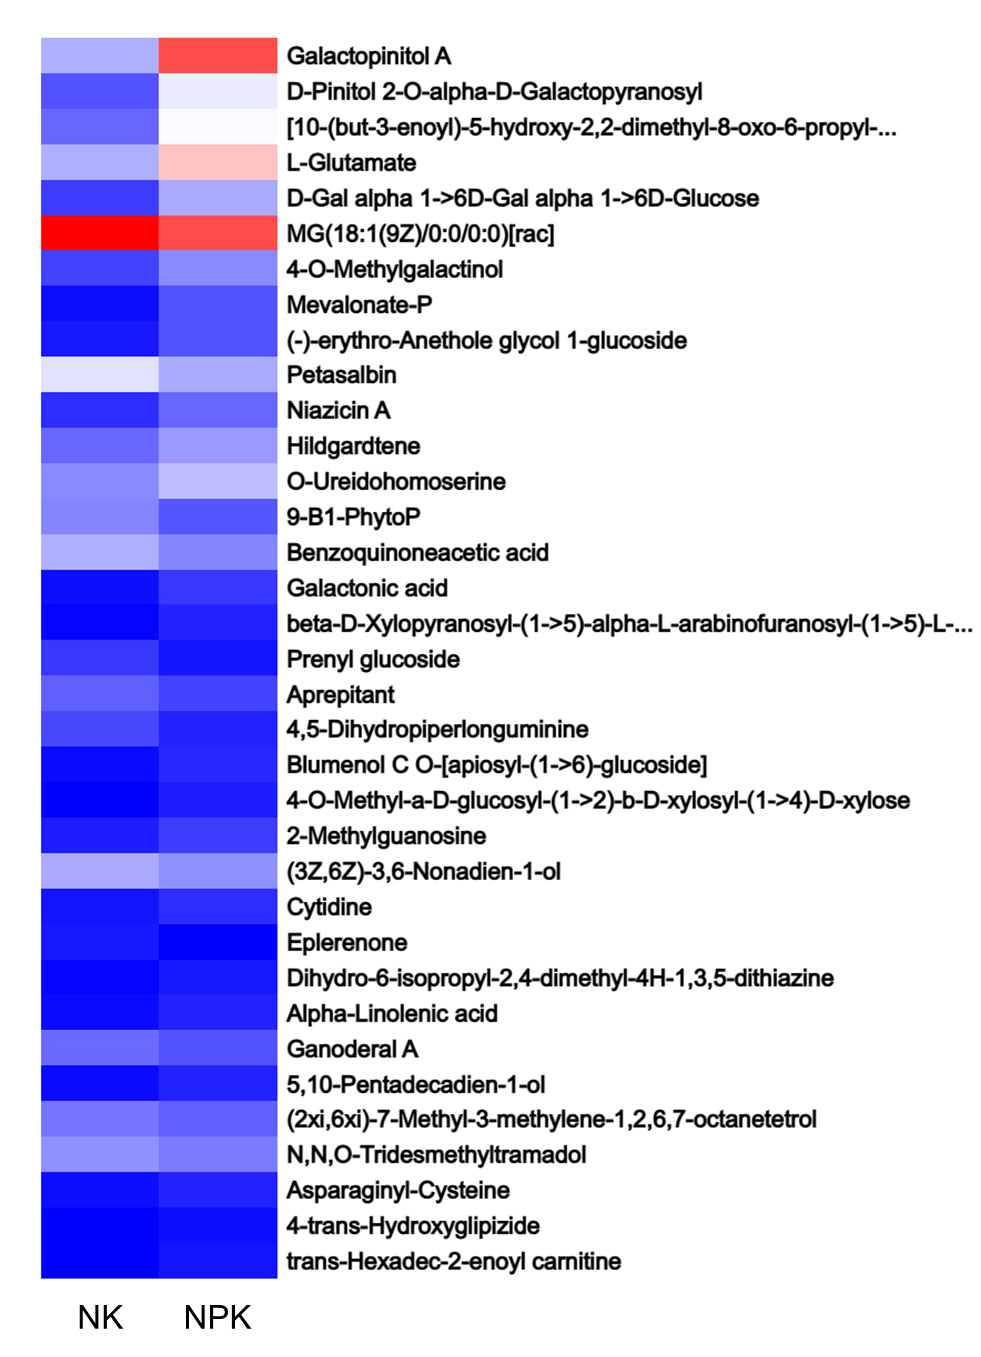


Fig. S2 Differentially expressed metabolites (DEMs) (A) of Shangshu 19 rhizosphere


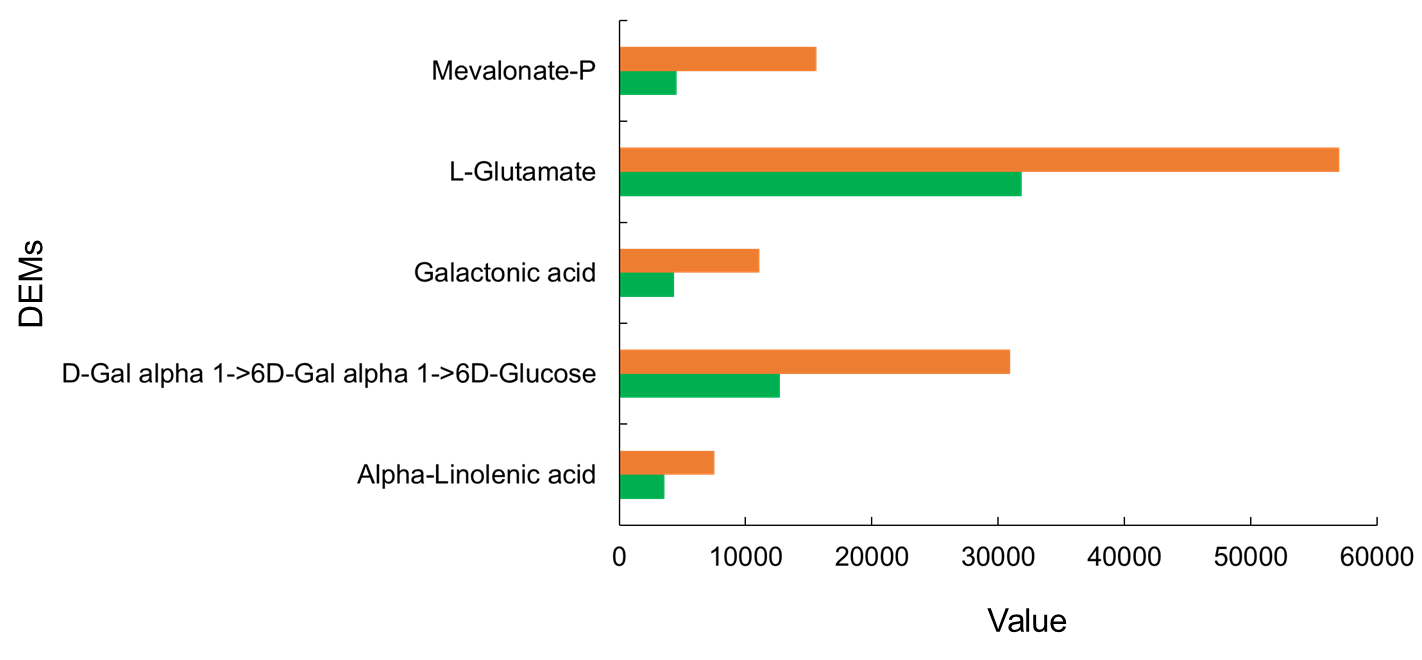


Fig. S3 KEGG enriched differentially expressed metabolites (DEMs) of Shangshu 19 rhizosphere
